# Supplementary material for: Ultrafine Mo2C nanoparticles encapsulated in N-doped carbon nanofibers with enhanced lithium storage performance
Source: Royal Society of Chemistry journal article supplement (doi:10.1039/c5cp03890a), 2015-01-01
Supplement: c5cp03890a1.pdf [file c5cp03890a1.pdf]

## **Electronic Supplementary Information**

### **Ultrafine Mo<sub>2</sub>C nanoparticles encapsulated in N-doped carbon nanofibers with enhanced lithium storage performance**

Ruirui Li, Shuguang Wang, Wei Wang, Minhua Cao\*

Key Laboratory of Cluster Science, Ministry of Education of China, Beijing Key Laboratory of Photoelectronic/Electrophotonic Conversion Materials, Department of Chemistry, Beijing Institute of Technology, Beijing 100081, P. R. China

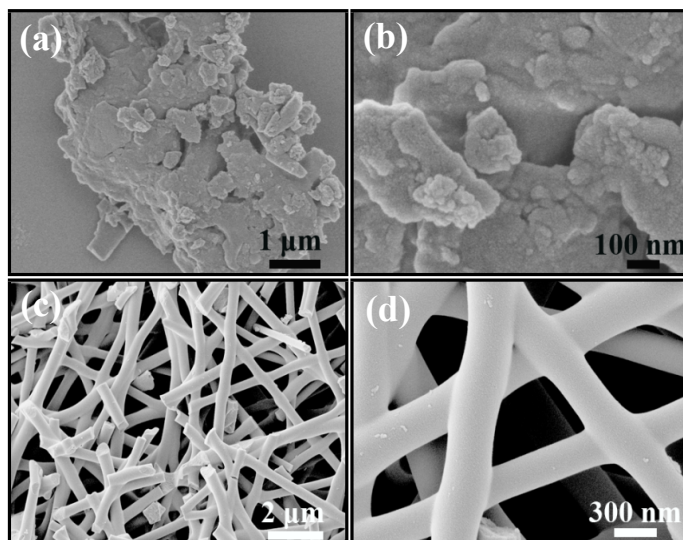

**Fig. S1** FE-SEM images at low- and high-magnifications. (a,b) bulk Mo<sub>2</sub>C and (c,d) N-CNFs obtained at 800 °C in N<sub>2</sub> atmosphere for 3 h.

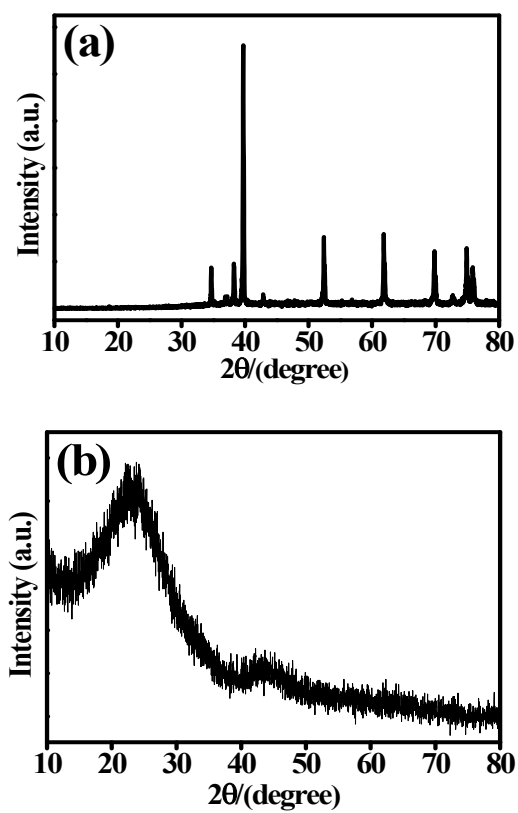

**Fig. S2** XRD patterns of bulk Mo<sub>2</sub>C (a) and N-CNFs (b).

**Table S1.** CHN elemental analysis data.

| Samples                 | N %  | C %   | H %  |
|-------------------------|------|-------|------|
| Mo <sub>2</sub> C-NCNFs | 1.86 | 34.41 | 1.05 |
| N-CNFs                  | 6.37 | 86.15 | 1.32 |

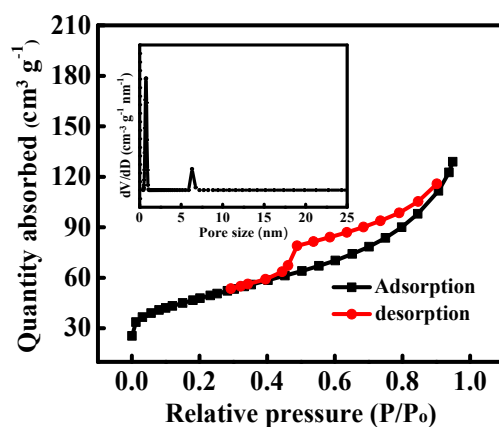

**Fig. S3** Nitrogen adsorption–desorption isotherms of the Mo<sub>2</sub>C-NCNFs hybrid. The inset shows the corresponding pore size distribution plot.

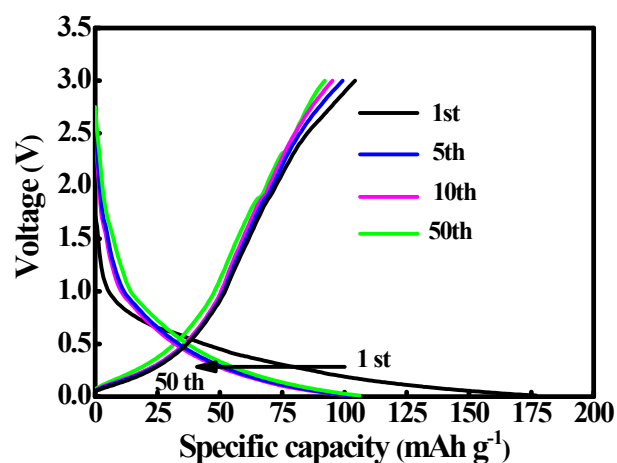

**Fig. S4** Galvanostatic charge/discharge profiles of the bulk Mo<sub>2</sub>C electrode at a current density of 100 mA g<sup>-1</sup> between 0.01 and 3.0 V for the 1st, 5th, 10th, and 50th cycles.

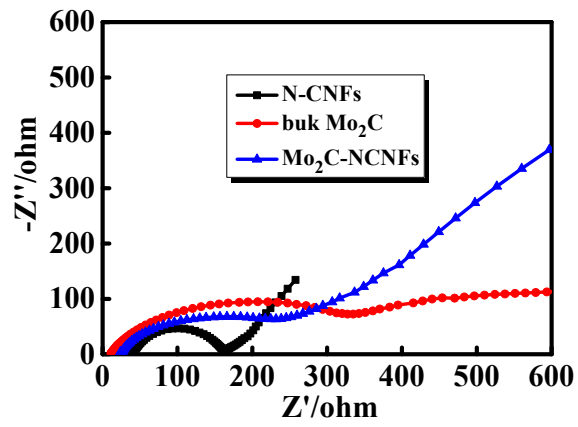

**Figure S5.** EIS curves of  $\text{Mo}_2\text{C}$ -NCNFs, N-CNFs and bulk  $\text{Mo}_2\text{C}$  electrodes before cell testing.

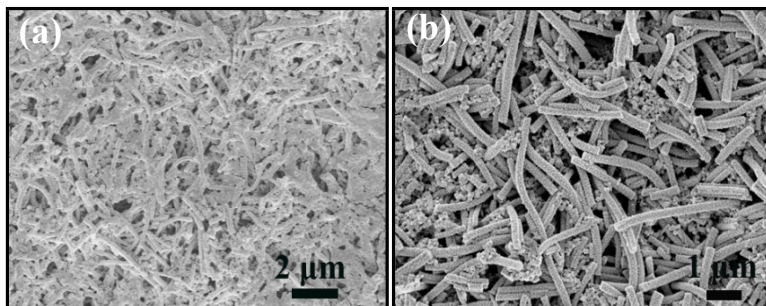

**Fig. S6** FE-SEM images of  $\text{Mo}_2\text{C}$ -NCNFs hybrid after 50 charge–discharge cycles at a current density of  $100 \text{ mA g}^{-1}$ .
